1 Identification and *in silico* analysis of the origin recognition complex in  
2 the human fungal pathogen *Candida albicans*

3  
4 Sreedevi Padmanabhan<sup>1</sup>, Kaustuv Sanyal<sup>2\*</sup>, Dharani Dhar Dubey<sup>1\*</sup>

5 <sup>1</sup>Molecular Biology Laboratory, Department of Biotechnology, Veer Bahadur Singh Purvanchal  
6 University, Jaunpur 222 003, Uttar Pradesh, India, <sup>2</sup>Molecular Mycology Laboratory, Molecular  
7 Biology and Genetics Unit, Jawaharlal Nehru Centre for Advanced Scientific Research, Jakkur,  
8 Bangalore 560 064, India.

9  
10 \* Corresponding author

11  
12 Email address: [sanyal@jncasr.ac.in](mailto:sanyal@jncasr.ac.in); [dddubey2003@gmail.com](mailto:dddubey2003@gmail.com)

13  
14 Telephone number: 91-80-22082878; 91-9453362949

15  
16 Fax number: 91-80-22082766

17  
18

## 19 **Abstract**

20 DNA replication in eukaryotes is initiated by the orchestrated assembly and association of  
21 initiator proteins (heterohexameric Origin Recognition Complex, ORC) on the replication  
22 origins. These functionally conserved proteins play significant roles in diverse cellular processes  
23 besides their central role in ignition of DNA replication at origins. While *Candida albicans*, a  
24 major human fungal pathogen, is an ascomycetous, asexual, diploid budding yeast but it is  
25 significantly diverged from a much better studied model organism *Saccharomyces cerevisiae*.  
26 The components of the DNA replication machinery in *C. albicans* remain largely  
27 uncharacterized. Identification of factors required for DNA replication is essential for  
28 understanding the evolution of the DNA replication machinery. We identified the putative ORC  
29 homologs in *C. albicans* and determined their relatedness with those of other eukaryotes  
30 including several yeast species. Our extensive *in silico* studies demonstrate that the domain  
31 architecture of CaORC proteins share similarities with the ORC proteins of *S. cerevisiae*. We  
32 dissect the domain organization of ORC (trans-acting factors) proteins that seem to associate  
33 with DNA replication origins in *C. albicans*. We present a model of the 3D structure of CaORC4  
34 to gain further insights of this protein's function.

## 35 **Introduction**

36 DNA replication in eukaryotes is initiated by the orchestrated assembly and association of  
37 initiator proteins on the replication origins. The hunt for initiator proteins in higher eukaryotes  
38 picked up pace after the discovery of the Origin Recognition Complex (ORC) comprising of six  
39 protein subunits of the ORC1-6 complex in budding yeast<sup>1</sup>. Extensive studies in other organisms  
40 showed that the initiator ORC proteins are functionally conserved in all eukaryotes and the

41 association of ORC proteins with DNA replication origins is critical for initiation of DNA  
42 replication, a fundamental process of life. The replicators, occupied by ORC proteins, fire  
43 asynchronously in S phase. Replicators in different organisms have widely variable DNA  
44 sequence requirements. In some organisms no obvious DNA sequence requirements could be  
45 detected. The sequential assembly of the pre-replication complex (pre-RC) proteins on the  
46 origins is mediated by ORC. ORC orthologs have been identified in many eukaryotes like  
47 *Schizosaccharomyces pombe*, *Drosophila melanogaster*, *Xenopus laevis*, and humans. Genetic  
48 and biochemical investigations demonstrate the ORC proteins of these organisms to be essential  
49 for DNA replication initiation<sup>2</sup>. Although the replication origins in higher eukaryotes do not  
50 share a consensus sequence as in bacteria or budding yeast, the proteins that are recruited to  
51 origins in most metazoans are similar to those in bacteria and yeast suggesting replication-  
52 associated proteins are evolutionarily conserved<sup>3-4</sup>. ORC-mediated ATP hydrolysis is essential  
53 for recruiting MCM (Mini Chromosome Maintenance) proteins<sup>5</sup> which subsequently act as  
54 helicases and unwind DNA double helix to facilitate initiation of DNA replication.

55 Besides playing a central role in DNA replication initiation at discrete origin sites, ORC  
56 proteins are also involved in a variety of cellular processes like heterochromatin formation,  
57 transcriptional regulation, S-phase checkpoint regulation, mitotic chromosome assembly, sister  
58 chromatid cohesion, cytokinesis, ribosome biogenesis and tissue specific gene regulation. ORC  
59 mutations are seen in various human diseases<sup>6</sup> such as Meier–Gorlin syndrome<sup>7, 8</sup>, EBV  
60 (Epstein–Barr virus)-infected diseases<sup>9</sup>, American trypanosomiasis and African  
61 trypanosomiasis<sup>10</sup>.

62           There has been a wide prevalence of yeast infections over the years with *Candida* species  
63 that can cause superficial to fatal systemic infections. These fungal infections can be fatal for  
64 immunocompromised individuals where the mortality rate is even higher<sup>11</sup>. Availability of a  
65 handful antifungal drugs and frequent isolation of drug-resistant isolates led to complications in  
66 disease management and treatment procedures<sup>12</sup>. Hence, to circumvent this malicious infection is  
67 to find species-specific new drug targets to develop more effective and safer antifungals. *C.*  
68 *albicans* is one such opportunistic fungal pathogens which is an asexual, diploid, budding  
69 yeast<sup>13-14</sup>. Protein complexes involved in the DNA replication of *C. albicans* are not  
70 characterized. As DNA replication is a rate limiting step in the propagation of the yeast and not  
71 many anti-fungal drugs are available to curb *Candida* infection, in this study we sought to  
72 identify and dissect the domain architecture of CaORC proteins with an aim to provide clues on  
73 their evolutionary conservation/diversification across various species to explore their potential as  
74 species-specific drug targets.

## 75 **Results**

### 76 **Identification of preRC genes in *C. albicans* genome by *in silico* analysis**

77           First, we identified the homologs of the preRC complex in *C. albicans*, determined  
78 relatedness of these proteins present in other species, compared the various domains such as the  
79 BAH domain, AAA+, AT-hook and Walker motifs in the ORC proteins of a number of species  
80 and predicted the structure of ORC4 in *C. albicans*, CaORC4. The CaORC1-6 genes were  
81 identified by a BLAST search with *S. cerevisiae* ScORC1-6 as the query sequences against the  
82 *C. albicans* genome database (CGD) ([http://www.candidagenome.org/cgi-bin/compute/blast-](http://www.candidagenome.org/cgi-bin/compute/blast-sgd.pl)  
83 [sgd.pl](http://www.candidagenome.org/cgi-bin/compute/blast-sgd.pl)) (Table 1 and Table 2).

84 ClustalW2 is a DNA or protein multiple sequence alignment program  
85 for multiple sequences<sup>15</sup>. We performed a pair-wise amino acid sequence alignment of the  
86 CaORC proteins with those of *S. cerevisiae*, *S. pombe*, *Drosophila*, *Xenopus*, Mouse and humans  
87 individually and their respective clustalW scores are tabulated (Table 3). Although, in general,  
88 the CaORC proteins show limited sequence similarities with their counterparts in various  
89 species, CaORC1, 2 and 6 show maximum similarities to their *S. cerevisiae* counterparts while  
90 CaORC3, 4 and 5 appear to be more similar to those of mammals which is evident from the  
91 phylogenetic map (Figure 1A).

## 92 **BAH domain in ORC proteins**

93 The ExPASy PROSITE consists of documentation entries describing protein domains,  
94 families and functional sites as well as associated patterns and profiles to identify them. The  
95 ExPASy PROSITE tool predicts the presence of an evolutionarily conserved BAH<sub>2</sub> domain  
96 spanning the region between 44<sup>th</sup> and 179<sup>th</sup> amino acids at the N-terminal of CaORC1 (Figure  
97 1B). The BAH domain is involved in protein-protein interactions and has been found to be  
98 important in DNA methylation, replication and transcriptional regulation<sup>16</sup>.

## 99 **AAA+ domains in CaORC proteins**

100 ATPases associated with various cellular activities (AAA+) domains<sup>17-18</sup> are those that are  
101 activated by ATP binding and inactivated by ATP hydrolysis<sup>19-23</sup>. The ATPase activity is  
102 indispensable for the origin-ORC association and henceforth for the establishment of the pre-  
103 initiation complex. Preventing ORC ATP hydrolysis inhibits repeated MCM2-7 loading<sup>5</sup>.  
104 CaORC1 and CaORC4, each contains a consensus AAA+ domain (420-571 a.a. in CaORC1;  
105 139-318 a.a. in CaORC4) (Figure 1B, 1C and 1D), which belongs to the AAA+ family that is

106 pivotal to the initiation of eukaryotic DNA replication. There is an amino acid residue Tyr<sup>174</sup> in  
107 human ORC4 (Tyr<sup>232</sup> in *S. cerevisiae*) that is found between the Walker B motif and sensor I of  
108 the AAA+ domain which may be responsible for interacting with a conserved arginine residue on  
109 an adjacent helix structure of ORC4<sup>2, 6, 21, 23-26</sup>. This residue is present in CaORC4 (Tyr<sup>273</sup>) too  
110 probably doing a similar function.

111 Although the ScORC1-ORC5 all have AAA+ domains, there is a variation among the  
112 subunits with respect to the catalytic core motifs within the Walker A and B motif regions both  
113 within and between the species. It is reported with experimental evidence that only the ScORC1  
114 and ScORC5 can bind ATP, of which only ScORC1 has a perfect signature to the Walker B  
115 motif. By consensus, it is considered that the ORC1 would be the prime ATPase of all the  
116 eukaryotes examined so far<sup>25, 26</sup>. In metazoans too, although the ORC1, ORC4 and ORC5 bind  
117 ATP, the Walker A signature is found to have perfect match with ORC4. A similar pattern is  
118 observed in CaORC proteins too demonstrating their close homology with the higher eukaryotes.  
119 The Walker A motifs in ORC5 seem to be diverged (Table 4).

#### 120 **Walker A and B motifs in CaORC proteins**

121 The motif GXXXXGKT (X, any residue) is a common nucleotide binding fold in the  $\alpha$ - and  
122  $\beta$ -subunits of F1-ATPase, myosin and other ATP-requiring enzymes<sup>27</sup>. This motif is present in  
123 the shape of a loop around nucleotides and utilizes its highly conserved residues of lysine and  
124 threonine to bind to their phosphate oxygen atoms. This consensus sequence of  
125 GXXXXGKT(S), with serine substituting threonine in some cases, is more popularly known as  
126 the Walker loop or P-loop (phosphate binding loop). The Walker B motif with the consensus  
127 sequence hhhhDE (a negatively charged residue followed by a stretch of hydrophobic a.a.,h) is  
128 essential for ATP hydrolysis. The Walker motifs are present in CaORC1, CaORC4 and CaORC5

129 (Walker B is absent in CaORC5) (Table 4). Besides CaORC1, the perfect signature of the  
130 Walker motif is found in CaORC4 with a putative Walker A motif (147-153 a.a) and a putative  
131 Walker B motif (410-426 a.a) the amino acid sequences for which are shown in Table 5. These  
132 motif signatures seem to be more closely related to the metazoan/higher eukaryotic sequences.

### 133 **AT-hook motifs in CaORC proteins**

134 AT hooks are DNA-binding motifs with a preference for A/T rich regions. These motifs  
135 are found in a variety of proteins, including the high mobility group (HMG) proteins. The AT-  
136 hook is a small motif which has a typical sequence pattern centered on a glycine-arginine-proline  
137 (GRP) tripeptide<sup>28,29</sup>. The importance of this short conserved sequence is that it is necessary and  
138 sufficient for binding DNA and ori-ORC association. CaORC2 is found to have an AT-hook  
139 motif (182-197a.a, Figure 1D, Table 6) indicative of its propensity to bind origins.

### 140 **PIP motif in CaORC proteins**

141 A conserved Proliferating Cell Nuclear Antigen (PCNA) binding motif called the PCNA-  
142 interacting protein (PIP) box (QXXMXXFFFY) is found in the CaORC1 protein (524-536 a.a).  
143 Of the CaORC proteins, the PIP box is found to be unique to CaORC1.

### 144 **MOD1 motif in CaORC3**

145 Two independent domains in human ORC3, a coiled-coil domain at the N terminus and a  
146 second region containing a MOD1-interacting region (MIR; 213-218aa)<sup>30</sup>, were found to be  
147 directly bound to the heterochromatin protein, HP1 $\alpha$ <sup>31</sup>. A conserved peptide motif named MIR  
148 (MOD1 interacting region - PXVHH) which is essential for their interaction with MOD1, a  
149 serotonin-gated chloride channel that modulates locomotory behavior in *C. elegans*<sup>32</sup> is found in  
150 CaORC3 protein (435-448 a.a).

151           Although the CaORC proteins share less amino acid sequence homology with the ORC  
152 proteins of *S. cerevisiae* and *S. pombe*, the other ORC associated proteins (MCM proteins) seem  
153 to have higher homology (Table 7). Interestingly, the predicted molecular weights of the ORC  
154 complexes are equal in these three yeasts (Table 8).

### 155 **PEST motif in CaORC proteins**

156           A PEST sequence is a peptide sequence that is rich in proline (P), glutamic  
157 acid (E), serine (S), and threonine (T). This sequence is associated with proteins that have a short  
158 intracellular half-life; hence, it is hypothesized that the PEST sequence acts as a signal  
159 peptide for protein degradation. CaORC2 (130-172 a.a.) and CaORC3 (6-33 a.a.) contain PEST  
160 motif. Analysis of PEST signals in human and mouse ORC proteins suggests that only ORC1 is  
161 targeted for ubiquitination which is likely to hold good for all mammals<sup>33</sup>. The domains of  
162 CaORC proteins are compared with other eukaryotes and are tabulated in Table 6 and compared  
163 with *S. cerevisiae* in Figure 1D. Recent studies have shown the evolution of the phospho  
164 regulation pattern in replication proteins of various yeast species including *C. albicans*<sup>34</sup>.

### 165 **Evolutionary relationships of ORC proteins**

166           Molecular Evolutionary Genetics Analysis (MEGA) is an integrated tool for conducting  
167 sequence alignment, inferring phylogenetic trees, estimating divergence times, mining online  
168 databases, estimating rates of molecular evolution, inferring ancestral sequences, and testing  
169 evolutionary hypotheses<sup>35</sup>. The evolutionary history was inferred using the Neighbor-Joining  
170 method<sup>36</sup>. The optimal tree with the sum of branch length = 29.06450731 is shown in Figure 1A.  
171 The ORC1, ORC2 and ORC5 proteins from yeast to humans are found to have common nodes.  
172 Subsequently, the ORC proteins from the related species of *C. albicans* in the CTG clade were  
173 also compared and a phylogenetic tree was constructed (Figure 2A). The time tree demonstrates



174 the diversification rate of these ORC proteins across the species of which ORC1 and ORC4 seem  
175 to be older than their counterparts (Figure 2B). In order to understand the sequence identity of  
176 the ORC sequences across various yeast species, Sequenceserver (<http://blast.wei.wisc.edu/>)<sup>37,38</sup>  
177 was used across 86 publicly available yeast genomes (Figure 3; Supplementary Table 1).

## 178 **Structure prediction of CaORC proteins**

### 179 **Prediction of secondary structure using Phyre**

180 Over the past few decades, a number of computational tools for protein structure prediction  
181 have been developed. The **protein homology/analogy recognition engine (Phyre)** is one of the  
182 widely used structure prediction systems providing a simple interface to results. The Phyre server  
183 (<http://www.imperial.ac.uk/phyre>) uses a library of known protein structures taken from the  
184 Structural Classification of Proteins (SCOP) database<sup>39</sup> and augmented with newer depositions in  
185 the Protein Data Bank (PDB)<sup>40</sup>. The sequence of each of these structures is scanned against a  
186 non-redundant sequence database and a profile is generated and deposited in the ‘fold library’.  
187 The known and predicted secondary structure of these proteins is also stored in the fold library.  
188 The popular web servers for fold recognition are Phyre, I-TASSER, SAM-T06, HHpred.

189 We used I-TASSER (Iterative Threading ASSEmbly Refinement<sup>41</sup>) for structure prediction  
190 of CaORC proteins. Of all the CaORC proteins, CaORC4 was found to be one of the putative  
191 candidates for further fine refinement studies of the protein structure due to its higher Cscore  
192 (combined measure, See Methods section) which indicates a better confidence in predicting the  
193 function using the template (Table 9). Hence, we proceeded for predicting the structure of  
194 CaORC4 using Phyre.

195

196

## 197 **Secondary structure and disorder prediction for CaORC4**

198 The query sequence (CaORC4p) is scanned against the non-redundant sequence database and  
199 a profile is constructed. Five iterations of PSI-BLAST are used to gather both close and remote  
200 sequence homologs. The PSI-BLAST provides a means of detecting distance relationships  
201 between proteins. The pair-wise alignments generated by PSI-BLAST are combined into a single  
202 alignment with the query sequence as the master. The secondary structure of CaORC4p is  
203 predicted following profile construction.

204 Three independent secondary structure prediction programs are used in Phyre: Psi-Pred1<sup>42</sup>,  
205 SSPro<sup>43</sup> and JNet<sup>44</sup>. The output of each program is in the form of a three-state prediction: alpha  
206 helix, beta strand and coil. Each of these three programs provides a confidence value at each  
207 position of the query for each of the three secondary structure states. These confidence values are  
208 averaged and a final, consensus prediction is calculated and displayed beneath the individual  
209 predictions.

## 210 **Fold recognition for CaORC4**

211 The profile and secondary structure of CaORC4 is then scanned against the fold library  
212 using a profile–profile alignment algorithm detailed in<sup>45</sup>. This alignment process returns a score  
213 on which the alignments are ranked. These scores are fitted to an extreme value distribution to  
214 generate an E-value. The top ten highest scoring alignments are then used to construct full 3D  
215 models of the CaORC4p (Figure 4A and Figure 4B).

## 216 **Interactions of pre-RC proteins – SMART prediction**

217 SMART (Simple Modular Architecture Research Tool) is a web-based tool  
218 (<http://smart.embl.de/>) that allows rapid identification and annotation of protein domains and the  
219 analysis of protein domain architectures. This provides the complete set of protein descriptions

220 allowing users to quickly find relevant information<sup>46-47</sup>. The predicted functional partners of the  
221 preRC proteins in *C. albicans* are enlisted in the Table 10 and are also shown schematically in  
222 the Figure 4C-H. In short, it is evident that although the size of the individual proteins in the  
223 ORC complex across diverse yeast species is varied, the whole complex constitutes to ~412 KDa  
224 (Table 8). Our *in silico* analysis suggests that although CaORC proteins share less sequence  
225 homology with yeasts, *Drosophila*, *Xenopus*, mouse and humans (Table 7), some of the  
226 characteristic functional motifs are retained in them (Figure 1D, Table 6). CaORC1 is found to  
227 have the BAH domain and the PIP motif, CaORC2 has an AT-hook motif, and CaORC3 has a  
228 MOD1-interacting region (MIR). The AAA ATPase is found in CaORC1 and CaORC4 and the  
229 PEST motif is found in CaORC2 and CaORC3. We used Phyre to predict the secondary structure  
230 and modeled the 3D structure of CaORC4 with walker A and B motifs and arginine finger motif.  
231 We used SMART predictions to check the putative interactive partners of CaORC proteins of  
232 which CaORC4 was found to have no direct interaction with any other CaORC protein.

## 233 **Discussion**

234 CaORC proteins (CaORC1-6) and their associated proteins were identified by a BLAST  
235 analysis using the *S. cerevisiae* proteins as the query sequences in the Candida Genome Database  
236 (CGD). The phylogenetic analysis suggests that in spite of limited amino acid sequence  
237 similarity with their counterparts in other organisms, the CaORC proteins share most of the  
238 functional domains with them. Interestingly, the amino acid sequences of CaORC1, 2 and 4  
239 share higher degree of similarities than CaORC3, 5 and 6 to those of *S. cerevisiae*. CaORC1, 4  
240 and 5 tend to be homologous to the mammalian counterparts. Moreover, the CaORC proteins  
241 are also compared across CTG clade and other yeast species to provide a robust roadmap for  
242 further comparative yeast subphylum analysis (Figure 2 and Figure 3). Of the other preRC

243 components compared here, Cdt1 has no apparent homolog in *C. albicans*, whereas, all other  
244 pre-RC proteins such as Cdc6 and Mcm2-7 are very similar to their counterparts in other yeasts.

245 The main function of ORC proteins is to associate specifically with origins and recruit  
246 other factors including Cdc6 and MCM2-7 to form the preRC. In *S. cerevisiae*, the origins have a  
247 conserved stretch of 11 bp, the ARS consensus sequence, ACS, which is essential for ORC  
248 binding and origin activity. The replication origins of *C. albicans* (based on limited available  
249 data<sup>48-51</sup>) appear to be similar to those of *S. pombe* and other higher eukaryotes in having no such  
250 consensus sequence. In *S. pombe*, ORC4 binds with AT-rich origins via its 9 AT-hook motifs.  
251 Moreover, the ORC-origin binding might be affected both by intrinsic factors such as the DNA  
252 sequence that marks the ORC binding site and by extrinsic factors such as the chromatin  
253 component that marks both the histone and non-histone proteins. The absence of conserved  
254 sequences in *C. albicans* origins<sup>50</sup> along with our *in silico* analysis suggests that the CaORC-  
255 origin interactions would be largely chromatin dependent. In the genome-wide studies for  
256 identification of replication origins in *C. albicans* by ChIP-microarray based approach using an  
257 antibody against *S. cerevisiae* ORC complex, low nucleosome occupancy has been shown as  
258 conserved landmark of replication origins in *C. albicans*<sup>51</sup>.

259 The BAH module found in several chromatin-associated proteins play important roles in  
260 gene silencing, replication and transcriptional regulation by promoting protein-protein  
261 interaction<sup>12</sup>. The BAH domain of humanORC1 has been shown to bind to H4K20me2<sup>52</sup> and  
262 abrogation of this binding causes impaired ORC1 loading onto origins, and cell cycle  
263 progression. The BAH domain present in CaORC1 along with the highly conserved basic  
264 residues (K-362 and R-367)<sup>53</sup> in its AAA domain is likely to play a key role in ORC-origin  
265 binding in *C. albicans*.

266           The AAA+ domains present in different ORC subunits (ORC1 and 5 in *S. cerevisiae* and  
267 ORC1, 4, and 5 in metazoans) are important for the assembly of ORC at origins and those in  
268 Cdc6 are critical for the loading of the MCM proteins (Table 6). Like metazoans, the CaORC  
269 subunits 1, 4, and 5 and CaCdc6 containing AAA+ domains are likely to be engaged in ORC  
270 assembly and consequent MCM recruitment although a perfect match to the Walker A and B  
271 motifs are present only in CaORC4 (Table 4 and 5). In all tested organisms, ORC1 has been  
272 found to be the major ATPase required for ORC assembly at origins. Experimental evidence  
273 would be required to find out if some or all of these subunits are involved in ATP binding and  
274 hydrolysis in *C. albicans*. Cdt1 helps in Cdc6 recruitment to origin bound ORC and is important  
275 in cell cycle regulation of preRC assembly at origins and limiting replication to a single round  
276 per cell cycle. The absence of a Cdt1 homolog in *C. albicans* suggests that this important task  
277 may be accomplished by a different mechanism/factor (Table 6 and Table 7). The unique  
278 presence of the PEST motif in CaORC2 and CaORC3 indicates that these components might be  
279 degraded in a cell cycle specific manner facilitating ORC turnover. The unique sequence of nine  
280 copies of AT hook motifs present in SpORC4 are critical for origin binding of ORC4 which is  
281 ATP-independent in *S. pombe*<sup>24</sup>. In *S. cerevisiae*, the origin binding of ORC is ATP-dependent  
282 and the presence of single DNA-binding AT-hook motif (PRKRGRPRK) is identified in the  
283 disordered regions of ScORC2<sup>19</sup>. The presence of the small AT-hook motif in CaORC2 to be  
284 another plausible motif for origin binding and their role in replication remains highly speculative.  
285 Similarly, it remains elusive as to whether the presence of MIR domain in CaORC3 has any role  
286 in silencing by binding to any heterochromatin component like HP1.

287           In *S. cerevisiae*, the ScORC proteins associate with origins in a sequence-dependent  
288 manner. Only ORC1, ORC2, ORC4 and ORC5 appear to make direct contacts to A and B1

289 domains of the replication origin<sup>33, 54-55</sup>. ScORC3 helps in forming the stable complex without  
290 directly binding to the DNA whereas ORC6 does not bind to the DNA but helps in recruiting  
291 multiple Cdt1 molecules<sup>56-59</sup>. The situation is very different in *Drosophila* cells where DNA  
292 replication initiates at many sites, which are probably sequence independent, throughout the  
293 genome at the same time<sup>60</sup>. In contrast to ScORC6, which is not required for DNA binding,  
294 DmORC6 is required for the DNA binding of DmORC and is an integral part of the DmORC  
295 complex<sup>61</sup>. The DmORC6 alone has DNA binding activity, likely due to the predicted TFIIB-like  
296 DNA binding domain in the smallest subunit<sup>62</sup>. DmORC binds DNA with little sequence  
297 specificity. ORC proteins generally require ATP to interact specifically with origin DNA (except  
298 in the case of SpORC). In all the species studied so far, ORC1, ORC4 and ORC5 contain  
299 potential ATP binding sites. ATP hydrolysis by ORCs to regulate DNA binding is well studied in  
300 ScORCs and DmORCs<sup>26, 59</sup>. The *in silico* predictions by Beltrao and colleagues<sup>34</sup> showed the  
301 increasing probability of CaORC2, CaORC4 and CaORC6 proteins to be phosphorylated by  
302 Cdc28, a cyclin dependent protein kinase.

303 We were able to build the 3D protein structure of CaORC4 only whereas the other  
304 CaORC proteins did not have good homology with the known PDB (Protein Data Bank)  
305 structures. From our *in silico* analysis of interactive studies, it is evident that CaORC3, CaORC5  
306 and CaORC6 do not interact with the other ORC counterparts. It is possible that only CaORC1,  
307 CaORC2 and CaORC4 would be involved in DNA binding during the process of DNA  
308 replication and the other counterparts may aid in tethering or in conformational organization.  
309 CaCdc6 and Cdc54, the apparent common binding partners of CaORC1, CaORC2 and CaORC4  
310 and many MCMs are also predicted to play important role(s) in preRC assembly and functioning.  
311 We also find a potential ATP binding site in CaORC4 which might help in the regulation of

312 origin binding. The mode of ORC assembly at origins in *C. albicans* might be different from that  
313 in other yeasts. The *in silico* detection of the presence of AAA+ ATPase and Walker motifs in  
314 CaORC4 and its likely interaction with MCM proteins suggest that CaORC4 might be involved  
315 in stable binding to origin DNA and loading MCM proteins to origins. While possibilities of a  
316 physical association between CaORC4 and other CaORC proteins were not obvious, the role of  
317 some unknown factors mediating ORC assembly in *C. albicans* is not ruled out. CDC6, CDC54  
318 and MCM proteins interact with CaORC1, CaORC2 and CaORC4. In absence of a direct  
319 interaction of CaORC4 with other ORC counterparts, these proteins might be mediating  
320 interaction between them. Moreover, the absence of Cdt1 in *C. albicans* might provide an  
321 additional role for CaORC4.

322         Recent studies demonstrate that besides the involvement of specific proteins that control  
323 DNA replication, some enzymes with primary functions that are involved in various other  
324 processes can also play a vital role in the regulation of genome duplication. There seems to be a  
325 direct link between central carbon metabolism and DNA replication regulation from prokaryotes  
326 <sup>63-65</sup> to eukaryotes including humans<sup>66-67</sup>. A recent analysis<sup>66</sup> demonstrates that partial silencing  
327 of genes encoding for the glycolytic and TCA enzymes affects the entry of human fibroblasts  
328 into the S-phase. It is also reported that ScORC proteins interact with some of the metabolic  
329 genes that are associated with replication origins<sup>68</sup>. One such example is the hexokinase (HXK2)  
330 gene which at a decreased level causes substantial impairment in DNA synthesis. Our  
331 preliminary reports from Co-IP studies (data not shown) also showed an interaction of CaORC4  
332 with HXK2 by which it is speculated that CaORC4 might play a role in the regulation of central  
333 carbon metabolism besides its cardinal role of DNA replication. This can be further supported by  
334 the induced expression of CaORC4 in response to alpha pheromone in SpiderM medium<sup>69</sup>.

335 From the above observations, we hypothesize that CaORC4 might be less tightly  
336 associated with the core preRC complex but involved in cell cycle regulation and DNA  
337 checkpoint activation. It is quite possible that CaORC4 may not be bound to chromatin  
338 throughout the cell cycle as seen in *Drosophila* and yeast<sup>33</sup>. Recent studies advocate a concerted  
339 interaction between ORCs, nucleosomes and replication origin DNA that stabilizes ORC-origin  
340 binding in yeast. The atomic force microscope (AFM) studies show that ORC establishes its  
341 origin interaction by binding to both nucleosome-free origin DNA and neighboring nucleosomes  
342 that are species-specific<sup>70</sup>.

343 Recent reports suggest that Drg1, an AAA-ATPase protein is the potential target for the  
344 drug diazaborine. This drug is demonstrated to block ribosome biogenesis in yeast<sup>71</sup>. Similarly, a  
345 valosin containing AAA-ATPase protein, P97 is found to be a therapeutic target for CB-5083 in  
346 the cancer treatment<sup>72</sup>. A study on Trypanosoma ORC has raised possibilities on identifying  
347 novel drug targets demonstrating the drug potential of the pre-replication machinery<sup>73</sup>.

348 Our *in silico* studies would form the basis for understanding the domain architecture and  
349 further characterization of CaORC proteins which can be validated by *in vitro* studies. It may  
350 ultimately provide clues about the potential drug targets helping curb Candida infection at the  
351 step of DNA replication.

## 352 **Methods**

### 353 **Annotation of *C. albicans* pre-RC genes**

354 The genome of *C. albicans* (<http://www.candidagenome.org/>) was searched for homologs  
355 of pre-RC complex genes using BLAST<sup>74</sup>. Alignment of pre-RC gene sequences from Candida  
356 and its homologs in other eukaryotic organisms was carried out using the ClustalW algorithm<sup>15</sup>.



357 The pairwise ClustalW scores are calculated by the number of identities between the two  
358 sequences, divided by the alignment length in terms of percentage.

### 359 **Phylogenetic analysis**

360 Phylogenetic analysis was performed with the MEGA4 program<sup>75</sup>.

### 361 ***In silico* analysis**

362 The putative protein sequences whose theoretical characteristics were obtained using  
363 several programs in the ExPASy (Expert Protein Analysis System) server of the Swiss Institute  
364 of Bioinformatics ([www.expasy.ch/tools/](http://www.expasy.ch/tools/)). Protein sequences were entered into MotifScan  
365 (pattern searches), ProDOM (protein domain identification), Interpro (protein domain and pattern  
366 search identification), NetPhos (prediction sites for phosphorylation) and PESTfind  
367 (identification of PEST sequences), SMART (prediction of protein domain architecture) and  
368 Phyre (secondary structure prediction). To determine the sequence identity of CaORC across 86  
369 diverse publicly available yeast databases, a TBLASTN was performed in the Sequenceserver  
370 (<http://blast.wei.wisc.edu/>) with CaORC proteins as the query sequence<sup>37-38</sup> and the percent  
371 identity was plotted against the species using Graphpad Prism<sup>76</sup>.

### 372 **Phyre structure prediction parameters**

373 Cscore<sup>GO</sup> is a combined measure for evaluating global and local similarity between query  
374 and template protein. This score ranges from 0-1 where a higher value indicates a better  
375 confidence in predicting the function using the template. Cscore<sup>LB</sup> is the confidence score of  
376 predicted binding site of the protein with values ranging between 0-1. Higher the score more  
377 reliable is the ligand binding prediction.

## 378 References

- 379 1. Bell, S. P. & Stillman, B. ATP-dependent recognition of eukaryotic origins of DNA  
380 replication by a multiprotein complex. *Nature* **357**, 128-134, doi:10.1038/357128a0  
381 (1992).
- 382 2. Bell, S. P. & Dutta, A. DNA replication in eukaryotic cells. *Annu Rev Biochem* **71**, 333-  
383 374, doi:10.1146/annurev.biochem.71.110601.135425 (2002).
- 384 3. DePamphilis M. L. Replication origins in metazoan chromosomes: factor fiction?  
385 *Bioessays* **21**, 5-16, doi: 10.1002/(SICI)1521-1878(199901)21:1<5::AID-  
386 BIES2>3.0.CO;2-6 (1999).
- 387 4. Gilbert D. M. Making sense of eukaryotic DNA replication origins. *Science* **294**, 96-100,  
388 doi:10.1126/science.1061724 (2001).
- 389 5. Bowers, J. L., Randell, J. C. W., Chen, S. Y. & Bell, S. P. ATP hydrolysis by ORC  
390 catalyzes reiterative Mcm2-7 assembly at a defined origin of replication. *Mol Cell* **16**,  
391 967-978, doi:DOI 10.1016/j.molcel.2004.11.038 (2004).
- 392 6. Shen, Z. The origin recognition complex in human diseases. *Bioscience Rep* **33**, 475-483,  
393 doi:ARTN e00044 10.1042/BSR20130036 (2013).
- 394 7. Bicknell, L. S. et al. Mutations in the pre-replication complex cause Meier-Gorlin  
395 syndrome. *Nat Genet* **43**, 356-U156, doi:10.1038/ng.775 (2011).
- 396 8. Bicknell, L. S. et al. Mutations in ORC1, encoding the largest subunit of the origin  
397 recognition complex, cause microcephalic primordial dwarfism resembling Meier-Gorlin  
398 syndrome. *Nat Genet* **43**, 350-U103, doi:10.1038/ng.776 (2011).
- 399 9. Tao Q, Young L.S, Woodman C.B et al. Epstein-Barr virus (EBV) and its associated  
400 human cancers - Genetics, epigenetics, pathobiology and novel therapeutics. *Frontiers in*  
401 *Bioscience* **11**,2672-2713 (2006).
- 402 10. Dang, H. Q. & Li, Z. The Cdc45.Mcm2-7.GINS protein complex in trypanosomes  
403 regulates DNA replication and interacts with two Orc1-like proteins in the origin  
404 recognition complex. *J Biol Chem* **286**, 32424-32435, doi:10.1074/jbc.M111.240143  
405 (2011).
- 406 11. Low, C. Y. & Rotstein, C. Emerging fungal infections in immunocompromised patients.  
407 *F1000 Med Rep* **3**, 14, doi:10.3410/M3-14 (2011).
- 408 12. Whaley, S. G. et al. Azole Antifungal Resistance in Candida albicans and Emerging Non-  
409 albicans Candida Species. *Front Microbiol* **7**, doi:ARTN 2173  
410 10.3389/fmicb.2016.02173 (2017).
- 411 13. Riggsby, W. S., Torres-Bauza, L. J., Wills, J. W. & Townes, T. M. DNA content, kinetic  
412 complexity, and the ploidy question in Candida albicans. *Mol Cell Biol* **2**, 853-862  
413 (1982).
- 414 14. Kabir, M. A., Hussain, M. A. & Ahmad, Z. Candida albicans: A Model Organism for  
415 Studying Fungal Pathogens. *ISRN Microbiol*, **538694**, doi:10.5402/2012/538694 (2012).
- 416 15. Thompson, J.D, Higgins, D.G, Gibson T.J. CLUSTAL W: improving the sensitivity of  
417 progressive multiple sequence alignment through sequence weighting, position-specific  
418 gap penalties and weight matrix choice. *Nucleic Acids Res.* **22**,4673-4680 (1994).

- 419 16. Callebaut, I., Courvalin, J. C. & Mornon, J. P. The BAH (bromo-adjacent homology)  
420 domain: a link between DNA methylation, replication and transcriptional regulation.  
421 *Febs Lett* **446**, 189-193, doi:Doi 10.1016/S0014-5793(99)00132-5 (1999).
- 422 17. Duderstadt, K. E. & Berger, J. M. AAA plus ATPases in the initiation of DNA  
423 replication. *Crit Rev Biochem Mol* **43**, 163-187, doi:10.1080/10409230802058296  
424 (2008).
- 425 18. Wigley, D. B. ORC proteins: marking the start. *Curr Opin Struc Biol* **19**, 72-78,  
426 doi:10.1016/j.sbi.2008.12.010 (2009).
- 427 19. Duncker, B. P., Chesnokov, I. N. & McConkey, B. J. The origin recognition complex  
428 protein family. *Genome Biol* **10**, doi:ARTN 214 10.1186/gb-2009-10-3-214 (2009).
- 429 20. Kawakami, H. & Katayama, T. DnaA, ORC, and Cdc6: similarity beyond the domains of  
430 life and diversity. *Biochem Cell Biol* **88**, 49-62, doi:10.1139/O09-154 (2010).
- 431 21. Bell SP. The origin recognition complex: from simple origins to complex functions.  
432 *Genes Dev.* **16**, 659-672, doi: 10.1101/gad.969602 (2002).
- 433 22. Guernsey, D. L. et al. Mutations in origin recognition complex gene ORC4 cause Meier-  
434 Gorlin syndrome. *Nat Genet* **43**, 360-364, doi:10.1038/ng.777 (2011).
- 435 23. Iyer, L. M., Leipe, D. D., Koonin, E. V. & Aravind, L. Evolutionary history and higher  
436 order classification of AAA+ ATPases. *J Struct Biol* **146**, 11-31,  
437 doi:10.1016/j.jsb.2003.10.010 (2004).
- 438 24. Chuang, R. Y. & Kelly, T. J. The fission yeast homologue of Orc4p binds to replication  
439 origin DNA via multiple AT-hooks. *Proc Natl Acad Sci U S A* **96**, 2656-2661 (1999).
- 440 25. Speck, C., Chen, Z., Li, H. & Stillman, B. ATPase-dependent cooperative binding of  
441 ORC and Cdc6 to origin DNA. *Nat Struct Mol Biol* **12**, 965-971, doi:10.1038/nsmb1002  
442 (2005).
- 443 26. Klemm, R. D., Austin, R. J. & Bell, S. P. Coordinate binding of ATP and origin DNA  
444 regulates the ATPase activity of the origin recognition complex. *Cell* **88**, 493-502 (1997).
- 445 27. Walker, J. E., Saraste, M., Runswick, M. J. & Gay, N. J. Distantly related sequences in  
446 the alpha- and beta-subunits of ATP synthase, myosin, kinases and other ATP-requiring  
447 enzymes and a common nucleotide binding fold. *EMBO J* **1**, 945-951 (1982).
- 448 28. Reeves, R. & Nissen, M. S. The A.T-DNA-binding domain of mammalian high mobility  
449 group I chromosomal proteins. A novel peptide motif for recognizing DNA structure. *J*  
450 *Biol Chem* **265**, 8573-8582 (1990).
- 451 29. Aravind, L. & Landsman, D. AT-hook motifs identified in a wide variety of DNA-  
452 binding proteins. *Nucleic Acids Res* **26**, 4413-4421 (1998).
- 453 30. Murzina, N., Verreault, A., Laue, E. & Stillman, B. Heterochromatin dynamics in mouse  
454 cells: Interaction between chromatin assembly factor 1 and HP1 proteins. *Mol Cell* **4**,  
455 529-540, doi:Doi 10.1016/S1097-2765(00)80204-X (1999).
- 456 31. Prasanth, S. G., Shen, Z., Prasanth, K. V. & Stillman, B. Human origin recognition  
457 complex is essential for HP1 binding to chromatin and heterochromatin organization. *P*  
458 *Natl Acad Sci USA* **107**, 15093-15098, doi:10.1073/pnas.1009945107 (2010).
- 459 32. Ranganathan, R., Cannon, S. C. & Horvitz, H. R. MOD-1 is a serotonin-gated chloride  
460 channel that modulates locomotory behaviour in *C. elegans*. *Nature* **408**, 470-475 (2000).
- 461 33. Li, C. J. & DePamphilis, M. L. Mammalian Orc1 protein is selectively released from  
462 chromatin and ubiquitinated during the S-to-M transition in the cell division cycle. *Mol*  
463 *Cell Biol* **22**, 105-116, doi:Doi 10.1128/Mcb.22.1.105-116.2002 (2002).

- 464 34. Beltrao, P. et al. Evolution of Phosphoregulation: Comparison of Phosphorylation  
465 Patterns across Yeast Species. *Plos Biol* **7**, doi:ARTN e1000134  
466 10.1371/journal.pbio.1000134 (2009).
- 467 35. Kumar, S., Tamura, K. & Nei, M. Mega - Molecular Evolutionary Genetics Analysis  
468 Software for Microcomputers. *Comput Appl Biosci* **10**, 189-191 (1994).
- 469 36. Saitou, N. & Nei, M. The Neighbor-Joining Method - a New Method for Reconstructing  
470 Phylogenetic Trees. *Mol Biol Evol* **4**, 406-425 (1987).
- 471 37. Priyam, A., B. J. Woodcroft, V. Rai, A. Munagala, I. Moghul et al.,  
472 Sequenceserver: a modern graphical user interface for custom  
473 BLAST databases bioRxiv <http://biorxiv.org/lookup/doi/10.1101/033142>(2015).
- 474 38. Shen, X. X.et al.Reconstructing the backbone of the saccharomycotina yeast phylogeny  
475 using genome-scale data. *Genes Genomes Genetics* **6**, 3927-3939 (2016).
- 476 39. Murzin, A. G., Brenner, S. E., Hubbard, T. & Chothia, C. Scop - a Structural  
477 Classification of Proteins Database for the Investigation of Sequences and Structures. *J*  
478 *Mol Biol* **247**, 536-540, doi:Doi 10.1016/S0022-2836(05)80134-2 (1995).
- 479 40. Berman, H. M. et al. The Protein Data Bank and the challenge of structural genomics.  
480 *Nat Struct Biol* **7**, 957-959, doi:Doi 10.1038/80734 (2000).
- 481 41. Zhang, Y. I-TASSER server for protein 3D structure prediction. *BMC Bioinformatics* **9**,  
482 40, doi:10.1186/1471-2105-9-40 (2008).
- 483 42. McGuffin, L. J., Bryson, K. & Jones, D. T. The PSIPRED protein structure prediction  
484 server. *Bioinformatics* **16**, 404-405 (2000).
- 485 43. Pollastri, G., Przybylski, D., Rost, B. & Baldi, P. Improving the prediction of protein  
486 secondary structure in three and eight classes using recurrent neural networks and  
487 profiles. *Proteins* **47**, 228-235, doi:10.1002/prot.10082 (2002).
- 488 44. Cole, C.J.D., Barber, J.D., Barton, G.J. The Jpred 3 secondary structure prediction  
489 server. *Nucleic Acids Res* **36**, W197-201,doi: 10.1093/nar/gkn238 (2008).
- 490 45. Bennet-Lovsey, R.M., Herbert, A.D., Sternberg, M.J. et al. Exploring the extremes of  
491 sequence / structure space with ensemble fold recognition in the program Phyre. *Proteins*  
492 *: Structure, Function and Bioinformatics* **70**, 611-625, doi: 10.1002/prot.21688 (2008).
- 493 46. Schultz, J., Milpetz, F., Bork, P. & Ponting, C. P. SMART, a simple modular architecture  
494 research tool: Identification of signaling domains. *P Natl Acad Sci USA* **95**, 5857-5864,  
495 doi:DOI 10.1073/pnas.95.11.5857 (1998).
- 496 47. Letunic, I., Doerks, T. & Bork, P. SMART 7: recent updates to the protein domain  
497 annotation resource. *Nucleic Acids Research* **40**, D302-D305, doi:10.1093/nar/gkr931  
498 (2012).
- 499 48. Cannon, R. D., Jenkinson, H. F. & Shepherd, M. G. Isolation and nucleotide sequence of  
500 an autonomously replicating sequence (ARS) element functional in *Candida albicans* and  
501 *Saccharomyces cerevisiae*. *Mol Gen Genet* **221**, 210-218 (1990).
- 502 49. Beckerman, J., Chibana, H., Turner, J. & Magee, P. T. Single-copy IMH3 allele is  
503 sufficient to confer resistance to mycophenolic acid in *Candida albicans* and to mediate  
504 transformation of clinical candida species. *Infect Immun* **69**, 108-114, doi:Doi  
505 10.1128/iai.69.1.108-114.2001 (2001).
- 506 50. Mitra, S., Gomez-Raja, J., Larriba, G., Dubey, D. D. & Sanyal, K. Rad51-Rad52  
507 Mediated Maintenance of Centromeric Chromatin in *Candida albicans*. *Plos Genet* **10**,  
508 doi:ARTN e1004344 10.1371/journal.pgen.1004344 (2014).

- 509 51. Tsai, H. J. *et al.* Origin replication complex binding, nucleosome depletion patterns, and  
510 a primary sequence motif can predict origins of replication in a genome with epigenetic  
511 centromeres. *MBio* **5**, e01703-01714, doi:10.1128/mBio.01703-14 (2014).
- 512 52. Kuo, A.J., Song, J., Cheung, P *et al.* The BAH domain of ORC1 links H4K20me2 to  
513 DNA replication licensing and Meier-Gorlin syndrome, *Nature* **484**,115-119, doi:  
514 10.1038/nature10956 (2012).
- 515 53. Kawakami, H., Ohashi, E., Kanamoto, S., Tsurimoto, T. & Katayama, T. Specific  
516 binding of eukaryotic ORC to DNA replication origins depends on highly conserved  
517 basic residues. *Sci Rep-Uk* **5**, doi:ARTN 14929 10.1038/srep14929 (2015).
- 518 54. Clarey, M. G. *et al.* Nucleotide-dependent conformational changes in the DnaA-like core  
519 of the origin recognition complex. *Nature Structural & Molecular Biology* **13**, 684-690,  
520 doi:10.1038/nsmb1121 (2006).
- 521 55. Lee, D. G. & Bell, S. P. Architecture of the yeast origin recognition complex bound to  
522 origins of DNA replication. *Mol Cell Biol* **17**, 7159-7168 (1997).
- 523 56. Asano, T., Makise, M., Takehara, M. & Mizushima, T. Interaction between ORC and  
524 Cdt1p of *Saccharomyces cerevisiae*. *Fems Yeast Res* **7**, 1256-1262, doi:10.1111/j.1567-  
525 1364.2007.00299.x (2007).
- 526 57. Chen, S., Bell, S.P. CDK prevents Mcm2-7 helicase loading by inhibiting Cdt1  
527 interaction with Orc6. *Genes Dev* **25**, 363-372, doi: 10.1101/gad.2011511 (2011).
- 528 58. Chen S, de Vries MA, Bell SP. Orc6 is required for dynamic recruitment of Cdt1 during  
529 repeated Mcm2-7 loading. *Genes Dev* **21**, 2897-2907, doi: 10.1101/gad.1596807 (2007).
- 530 59. Takara, T. J. & Bell, S. P. Multiple Cdt1 molecules act at each origin to load replication-  
531 competent Mcm2-7 helicases. *Embo Journal* **30**, 4885-4896,  
532 doi:10.1038/emboj.2011.394 (2011).
- 533 60. Blumenthal, A. B., Kriegstein, H. J. & Hogness, D. S. The units of DNA replication in  
534 *Drosophila melanogaster* chromosomes. *Cold Spring Harb Symp Quant Biol* **38**, 205-223  
535 (1974).
- 536 61. Chesnokov, I., Remus, D. & Botchan, M. Functional analysis of mutant and wild-type  
537 *Drosophila* origin recognition complex. *Proc Natl Acad Sci U S A* **98**, 11997-12002,  
538 doi:10.1073/pnas.211342798 (2001).
- 539 62. Liu, S. X. *et al.* Structural analysis of human Orc6 protein reveals a homology with  
540 transcription factor TFIIB. *P Natl Acad Sci USA* **108**, 7373-7378,  
541 doi:10.1073/pnas.1013676108 (2011).
- 542 63. Janniere, L. *et al.* Genetic Evidence for a Link Between Glycolysis and DNA Replication.  
543 *Plos One* **2**, doi:ARTN e447 10.1371/journal.pone.0000447 (2007).
- 544 64. Maciag, M., Nowicki, D., Janniere, L., Szalewska-Palasz, A. & Wegrzyn, G. Genetic  
545 response to metabolic fluctuations: correlation between central carbon metabolism and  
546 DNA replication in *Escherichia coli*. *Microb Cell Fact* **10**, doi:Artn 19 10.1186/1475-  
547 2859-10-19 (2011).
- 548 65. Maciag-Dorszynska, M., Ignatowska, M., Janniere, L., Wegrzyn, G. & Szalewska-Palasz,  
549 A. Mutations in central carbon metabolism genes suppress defects in nucleoid position  
550 and cell division of replication mutants in *Escherichia coli*. *Gene* **503**, 31-35,  
551 doi:10.1016/j.gene.2012.04.066 (2012).
- 552 66. Konieczna, A., Szczepanska, A., Sawiuk, K., Lyzen, R. & Wegrzyn, G. Enzymes of the  
553 central carbon metabolism: Are they linkers between transcription, DNA replication, and  
554 carcinogenesis? *Med Hypotheses* **84**, 58-67, doi:10.1016/j.mehy.2014.11.016 (2015).



- 555 67. Lincet, H. & Icard, P. How do glycolytic enzymes favour cancer cell proliferation by  
556 nonmetabolic functions? *Oncogene* **34**, 3751-3759, doi:10.1038/onc.2014.320 (2015).
- 557 68. Shor, E. et al. The Origin Recognition Complex Interacts with a Subset of Metabolic  
558 Genes Tightly Linked to Origins of Replication. *Plos Genet* **5**, doi:ARTN e1000755  
559 10.1371/journal.pgen.1000755 (2009).
- 560 69. Bennett, R. J. & Johnson, A. D. The role of nutrient regulation and the Gpa2 protein in  
561 the mating pheromone response of *C. albicans*. *Mol Microbiol* **62**, 100-119,  
562 doi:10.1111/j.1365-2958.2006.05367.x (2006).
- 563 70. Hizume, K., Yagura, M. & Araki, H. Concerted interaction between origin recognition  
564 complex (ORC), nucleosomes and replication origin DNA ensures stable ORC-origin  
565 binding. *Genes Cells* **18**, 764-779, doi:10.1111/gtc.12073 (2013).
- 566 71. Loibl, M., Klein, I., Prattes, M et al. The drug diazaborine blocks ribosome biogenesis by  
567 inhibiting the AAA-ATPase Drg1, *J Biol Chem* **289**, 3913-3922, doi:  
568 10.1074/jbc.M113.536110 (2014).
- 569 72. Anderson, D.J, Moigne, R.L, Djakovic, S et al. Targeting the AAA ATPase p97 as an  
570 approach to treat cancer through disruption of protein homeostasis, *Cancer Cell* **28**, 653-  
571 665, doi: 10.1016/j.ccell.2015.10.002 (2015).
- 572 73. Calderano, S. G., de Melo Godoy, P. D., da Cunha, J. P. & Elias, M. C. Trypanosome  
573 prereplication machinery: a potential new target for an old problem. *Enzyme Res* **2011**,  
574 518258, doi:10.4061/2011/518258 (2011).
- 575 74. Altschul, S. F. et al. Gapped BLAST and PSI-BLAST: a new generation of protein  
576 database search programs. *Nucleic Acids Res* **25**, 3389-3402 (1997).
- 577 75. Tamura, K., Dudley, J., Nei, M. & Kumar, S. MEGA4: Molecular evolutionary genetics  
578 analysis (MEGA) software version 4.0. *Mol Biol Evol* **24**, 1596-1599,  
579 doi:10.1093/molbev/msm092 (2007).
- 580 76. Mary, L. S. GraphPad Prism, data analysis, and scientific graphing. *J. Chem. Inf.*  
581 *Comput. Sci* **37**, 411-412 doi: 10.1021/ci960402j(1997).
- 582 77. Zuckerkandl, E., Pauling, L. Molecules as documents of evolutionary history. *J Theor*  
583 *Biol* **8**, 357-366 (1965).
- 584 78. Coletta, A. et al. Low-complexity regions within protein sequences have position-  
585 dependent roles. *Bmc Syst Biol* **4**, doi:ArtN 43 10.1186/1752-0509-4-43 (2010).
- 586 79. Jones, D.T., Taylor, W.R., Thornton, J.M. The rapid generation of mutation data matrices  
587 from protein sequences, *Comput Appl Biosci* **8**, 275-282(1992).
- 588 80. Tamura, K. et al. MEGA6: Molecular Evolutionary Genetics Analysis version 6.0, *Mol*  
589 *Biol Evol* **30**, 2725-2729, doi: 10.1093/molbev/mst197 (2013).
- 590 81. Tamura, K. et al. Estimating divergence times in large molecular phylogenies, *Proc Natl*  
591 *Acad Sci USA* **109**,19333-19338, doi: 10.1073/pnas.1213199109 (2012).
- 592

## 593 Acknowledgements

594 This work was supported by Department of Biotechnology to KS and DDD  
595 (BT/PR13724/BRB/10/782/2010). The award of direct Senior Research Fellowships to SP from

596 Council of Scientific and Industrial Research (9/1014(0001)2K10-EMR-I) is greatly  
597 acknowledged. We thank Dr. E.J.Woo, Korea for the 3D structural studies.

### 598 **Author Contributions**

599 S.P. performed experiments, analyzed data and wrote the paper. K.S. and D.D. designed  
600 the study, analyzed data, and wrote the paper.

### 601 **Competing Interests**

602 The authors declare that they have no competing interests.

### 603 **Figure legends**

604 **Figure. 1. Evolutionary relationship of CaORC proteins with other species and**  
605 **comparative domain architecture of CaORC and ScORC proteins. (A)** Phylogram of ORC  
606 proteins. The tree is drawn to scale, with branch lengths in the same units as those of the  
607 evolutionary distances used to infer the phylogenetic tree. The evolutionary distances were  
608 computed using the Poisson correction method<sup>77</sup> and are in the units of the number of amino acid  
609 substitutions per site. All positions containing gaps and missing data were eliminated from the  
610 dataset (Complete deletion option). There were a total of 116 positions in the final dataset.  
611 Phylogenetic analyses were conducted in MEGA4<sup>35</sup>. **(B)** The SMART (Simple Modular  
612 Architecture Research Tool) prediction shows the presence of the BAH domain spanning  
613 between 44<sup>th</sup> and 179<sup>th</sup> amino acids at the N-terminal of CaORC1 and **(C)** The AAA+ domain in  
614 CaORC4 protein, the purple box represents the low complexity region (LCR). The LCR may be  
615 involved in flexible binding associated with specific functions but also that their positions within  
616 a sequence may be important in determining both their binding properties and their biological

617 roles<sup>78</sup>. **(D)** Comparative domain architecture of ORC proteins in *S. cerevisiae* and *C. albicans*.

618 The red box denotes the BAH domain, the grey box is the AAA+ domain, cyan bar represents  
619 the AT-hook motif, black bar represents the Walker motifs, dark blue bar represents the PIP  
620 motif, yellow bar represents the MIR motif and the green bar represents the PEST motif.

621 **Figure. 2. ORC phylogeny in CTG clade.** **(A)** Molecular Phylogenetic analysis of ORC  
622 proteins in the CTG clade by Maximum Likelihood method. The evolutionary history was  
623 inferred by using the Maximum Likelihood method based on the JTT matrix-based model<sup>75</sup>. The  
624 tree with the highest log likelihood (-14518.9956) is shown. Initial tree(s) for the heuristic search  
625 were obtained automatically by applying Neighbor-Join and BioNJ algorithms to a matrix of  
626 pairwise distances estimated using a JTT model, and then selecting the topology with superior  
627 log likelihood value. The tree is drawn to scale, with branch lengths measured in the number of  
628 substitutions per site. The analysis involved 29 amino acid sequences. All positions containing  
629 gaps and missing data were eliminated. There were a total of 237 positions in the final dataset.  
630 Evolutionary analyses were conducted in MEGA6<sup>80</sup>. **(B)** The time tree molecular Phylogenetic  
631 analysis of ORC proteins in the CTG clade by the Maximum Likelihood method. The timetree  
632 shown was generated using the RealTime method<sup>81</sup>. Divergence times for all branching points in  
633 the topology were calculated using the Maximum Likelihood method based on the JTT matrix-  
634 based model<sup>79</sup>. The estimated log likelihood value of the topology shown is -14518.9956. The  
635 tree is drawn to scale, with branch lengths measured in the relative number of substitutions per  
636 site. The analysis involved 29 amino acid sequences. All positions containing gaps and missing  
637 data were eliminated. There were a total of 237 positions in the final dataset. Evolutionary  
638 analyses were conducted in MEGA6<sup>80</sup>.



639 **Figure. 3. Comparative profile of percentage identity of CaORC proteins with other**  
 640 **yeasts.** The hexameric ORC complex containing ORC1-6 protein sequences are compared  
 641 individually with diverse yeast species whose genome database is publicly available<sup>37-38</sup> and their  
 642 percent identity is plotted using Graphpad Prism<sup>76</sup>. **(A)** Percent identity of 104 hits of ORC1  
 643 sequences. **(B)** Percent identity of 86 hits of ORC2 sequences. **(C)** Percent identity of 90 hits of  
 644 ORC3 sequences **(D).** Percent identity of 104 hits of ORC4 sequences. **(E)**Percent identity of 88  
 645 hits of ORC5 sequences. **(F)** Percent identity of 69 hits of ORC6 sequences.

646 **Figure. 4. 3D model of CaORC4 and putative interactors of CaORC proteins. (A)** 3D  
 647 model of CaORC4 with DNA. **(B)** 3D model of CaORC4 with Walker A bound to ATP sphere,  
 648 Walker B and R finger motifs. **(C-H)** Protein interaction map of the *C. albicans* pre-RC  
 649 including CaORC1, CaORC2, CaORC4, CaMCM2, CaMCM3, CaMCM5 (CDC46) respectively  
 650 (Table 10). The bright red circle is the query protein. The interaction map of CaMCM4 and  
 651 CaMCM6 are the same as CaMCM3.

652

653 **Table 1. Putative pre-RC proteins coded by the *C. albicans* genome**

| <b>Protein</b> | <b>ORF#</b> | <b>Chr#</b> | <b>Protein</b> | <b>ORF#</b> | <b>Chr#</b> |
|----------------|-------------|-------------|----------------|-------------|-------------|
| CaORC1         | Orf19.3000  | 1           | CaMCM2         | Orf19.4354  | R           |
| CaORC2         | Orf19.5358  | 2           | CaMCM3         | Orf19.1901  | 2           |
| CaORC3         | Orf19.6942  | 3           | CaMCM4         | Orf19.3761  | 1           |
| CaORC4         | Orf19.4221  | 5           | CaMCM5         | Orf19.5487  | 2           |
| CaORC5         | Orf19.2369  | R           | CaMCM6         | Orf19.2611  | R           |

|        |            |   |        |           |   |
|--------|------------|---|--------|-----------|---|
| CaORC6 | Orf19.3289 | 1 | CaMCM7 | Orf19.202 | 2 |
| CaCDC6 | Orf19.5242 | 1 |        |           |   |

654

655 **Table 2. Comparison of putative CaORC sequences with ORC sequences of *S. cerevisiae***  
 656 **and *S. pombe*.** The systematic names, ORF and protein length along with isoelectric pH of the  
 657 ORC1-6 in *S. cerevisiae*, *S. pombe* and *C. albicans*.

658

| Gene | <i>S.cerevisiae</i> |             |                      |      | <i>S.pombe</i>   |             |                      |      | <i>C.albicans</i> |             |                      |      |
|------|---------------------|-------------|----------------------|------|------------------|-------------|----------------------|------|-------------------|-------------|----------------------|------|
|      | Systematic name     | Length (bp) | Protein length (a.a) | pI   | Systematic name  | Length (bp) | Protein length (a.a) | pI   | Systematic name   | Length (bp) | Protein length (a.a) | pI   |
| ORC1 | YML065W             | 2745        | 914                  | 5.52 | SPBC29A1<br>0.15 | 2124        | 709                  | 7    | ORF19.3000        | 2418        | 805                  | 5.99 |
| ORC2 | YBR060C             | 1863        | 620                  | 9.45 | SPBC685.0<br>9   | 1608        | 535                  | 5.51 | ORF19.5358        | 2067        | 688                  | 8.26 |
| ORC3 | YLL004W             | 1851        | 616                  | 5.27 | SPAC3H1.<br>01C  | 2073        | 690                  | 5.59 | ORF19.6942        | 2049        | 682                  | 5.32 |
| ORC4 | YPR162C             | 1590        | 529                  | 6.39 | SPBP23A1<br>0.13 | 2919        | 972                  | 9.31 | ORF19.4221        | 1695        | 564                  | 6.19 |
| ORC5 | YNL261W             | 1440        | 479                  | 5.64 | SPBC646.1<br>4C  | 1368        | 455                  | 8.83 | ORF19.2369        | 1491        | 496                  | 6.22 |
| ORC6 | YHR118C             | 1308        | 435                  | 8.16 | SPBC2A9.<br>12   | 795         | 264                  | 8.48 | ORF19.3289        | 1092        | 363                  | 9.2  |

659

660

661 **Table 3. Pairwise alignment results of CaORC proteins with other eukaryotes**

662

| Protein Name | Clustal W scores |                 |                 |                 |                 |                 | Length of protein (a.a) |           |           |           |           |           |           |
|--------------|------------------|-----------------|-----------------|-----------------|-----------------|-----------------|-------------------------|-----------|-----------|-----------|-----------|-----------|-----------|
|              | <i>Ca vs Sc</i>  | <i>Ca vs Sp</i> | <i>Ca vs Dm</i> | <i>Ca vs Xl</i> | <i>Ca vs Mm</i> | <i>Ca vs Hs</i> | <i>Ca</i>               | <i>Sc</i> | <i>Sp</i> | <i>Dm</i> | <i>Xl</i> | <i>Mm</i> | <i>Hs</i> |
| ORC1         | 26               | 26              | 20              | 20              | 23              | 20              | 805                     | 914       | 709       | 924       | 886       | 840       | 861       |
| ORC2         | 25               | 21              | 19              | 16              | 20              | 19              | 688                     | 620       | 535       | 618       | 558       | 576       | 577       |
| ORC3         | 18               | 14              | 13              | 14              | 18              | 17              | 682                     | 616       | 690       | 721       | 709       | 715       | 712       |
| ORC4         | 25               | 24              | 21              | 23              | 25              | 23              | 564                     | 529       | 972       | 459       | 432       | 433       | 436       |
| ORC5         | 22               | 21              | 20              | 17              | 23              | 24              | 496                     | 479       | 455       | 460       | 448       | 435       | 435       |
| ORC6         | 17               | 12              | 6               | 15              | 9               | 11              | 363                     | 435       | 264       | 257       | 225       | 262       | 252       |

663

664 *Sc* – *Saccharomyces cerevisiae*; *Sp* – *Schizosaccharomyces pombe*; *Ca* – *Candida albicans*; *Dm*  
 665 – *Drosophila melanogaster*; *Xl* – *Xenopus laevis*; *Mm* – *Mus musculus*; *Hs* – *Homo sapiens*

666

667

668

669 **Table 4. Comparison of Walker A and Walker B motifs of CaORC proteins with other**  
 670 **species**

| <b>Protein name</b> | <b>Organism</b>        | <b>Walker A motif<br/>(GXXXXGKT/S)</b> | <b>Walker B motif<br/>(hhDE)</b> |
|---------------------|------------------------|----------------------------------------|----------------------------------|
| <b>ORC1</b>         | <i>S. cerevisiae</i>   | GTPGVGKT                               | LLDE                             |
|                     | <i>S. pombe</i>        | GTPGTGKT                               | LMDE                             |
|                     | <i>C. albicans</i>     | GVPGMGKT                               | LMDE                             |
|                     | <i>C.elegans</i>       | GVPGTGKT                               | LI DE                            |
|                     | <i>D. melanogaster</i> | GVPGTGKT                               | LVDE                             |
|                     | <i>M. musculus</i>     | GVPGTGKT                               | LVDE                             |
|                     | <i>H. sapiens</i>      | GVPGTGKT                               | LVDE                             |
| <b>ORC4</b>         | <i>S. cerevisiae</i>   | GPRQSYKT                               | IFDE                             |
|                     | <i>S. pombe</i>        | GPRGSGKS                               | VLEE                             |
|                     | <i>C. albicans</i>     | GPRSSGKT                               | SDLE                             |
|                     | <i>C.elegans</i>       | GERNCGRE                               | LVRD                             |
|                     | <i>D. melanogaster</i> | GPRGSGKT                               | ILEE                             |
|                     | <i>M. musculus</i>     | GPRGSGKT                               | ILDE                             |
|                     | <i>H. sapiens</i>      | GPRGSGKT                               | ILDE                             |
| <b>ORC5</b>         | <i>S. cerevisiae</i>   | GYSGTGKT                               |                                  |
|                     | <i>S. pombe</i>        | GVASTAKT                               |                                  |
|                     | <i>C. albicans</i>     | GYKSIGKT                               |                                  |
|                     | <i>C.elegans</i>       | GEDGSGRS                               |                                  |
|                     | <i>D. melanogaster</i> | GHSGTGKT                               |                                  |
|                     | <i>M. musculus</i>     | GHTASGKT                               |                                  |
|                     | <i>H. sapiens</i>      | GHTASGKT                               |                                  |

671

672 **Table 5. Putative signature of Walker motifs in CaORC proteins**

| Motif name     | Functions                               | Sequence             | Motif and sequence position in CaORC proteins                                        |
|----------------|-----------------------------------------|----------------------|--------------------------------------------------------------------------------------|
| Walker A motif | Motif associated with phosphate binding | GXXXXGK              | GVPGMGK (428-434) – CaORC1<br>GPRSSGK (147-153) – CaORC4<br>GYKSIGK (44-50) – CaORC5 |
| Walker B motif | Essential for ATP hydrolysis            | (R/K)XXXGXXXL/VhhhhD | RKPLVILMDE (506-515) – CaORC1<br>RTTGSNGVQDLVTSLSD (410-426) – CaORC4                |

673

674

675 **Table 6. Domains of *C.albicans* ORC proteins compared with other eukaryotes**

676

| Protein | <i>C.albicans</i>                                      | <i>S.cerevisiae</i>    | <i>S.pombe</i> | <i>D.melanogaster</i>  | <i>X.laevis</i>                    | <i>M.musculus</i>                  | <i>H.sapiens</i>                   | <i>A.thaliana</i>                                   |
|---------|--------------------------------------------------------|------------------------|----------------|------------------------|------------------------------------|------------------------------------|------------------------------------|-----------------------------------------------------|
| ORC1    | BAH domain, PIP motif, AAA ATPase, Walker A & B motifs | BAH domain, AAA ATPase | BAH domain     | BAH domain, AAA ATPase | BAH domain, AAA ATPase, PEST motif | BAH domain, AAA ATPase, PEST motif | BAH domain, AAA ATPase, PEST motif | BAH domain, PHD zinc finger, AAA ATPase, PEST motif |
| ORC2    | AT hook, PEST motif                                    | AT hook                | Not determined | No hits                | No hits                            | No hits                            | No hits                            | PEST motif                                          |
| ORC3    | MIR, PEST motif                                        | ND                     | Not determined | AAA ATPase (P loop)    | Not determined                     | No hits                            | MIR                                | Domain 1 Cullins, PEST motif                        |
| ORC4    | AAA ATPase, Walker A & B motifs                        | No hits                | AT hook        | AAA ATPase (P loop)    | AAA ATPase (P loop)                | AAA ATPase (P loop)                | AAA ATPase (P loop)                | AAA ATPase                                          |
| ORC5    | WalkerA motif                                          | AAA ATPase (P loop)    | Not determined | AAA ATPase (P loop)    | Not determined                     | AAA ATPase (P loop)                | AAA ATPase (P loop)                | AAA ATPase, PEST motif                              |
| ORC6    | No hits                                                | No hits                | Not determined | No hits                | Not determined                     | No hits                            | No hits                            | No hits                                             |
| CDC6    | AAA ATPase                                             | AAA ATPase             | Not determined | Not determined         | AAA ATPase                         | AAA ATPase                         | AAA ATPase                         | AAA ATPase                                          |
| CDT1    | No hits                                                | Not determined         | Not determined | No hits                | No hits                            | No hits                            | No hits                            | PEST motif                                          |

677

678

679

680 **Table 7. Comparison of the Clustal W scores and lengths of the ORC associated proteins in**  
 681 ***S. cerevisiae* and *S. pombe* with *C. albicans*.**

682

| Protein Name | Clustal W scores |                 |                 | Length of protein (a.a) |           |           |
|--------------|------------------|-----------------|-----------------|-------------------------|-----------|-----------|
|              | <i>Ca vs Sc</i>  | <i>Ca vs Sp</i> | <i>Sc vs Sp</i> | <i>Ca</i>               | <i>Sc</i> | <i>Sp</i> |
| CDC6         | 27               | 10              | 8               | 480                     | 513       | 1086      |
| CDT1         | NA               | NA              | 11              | NA                      | 604       | 444       |
| MCM2         | 67               | 58              | 60              | 903                     | 868       | 830       |
| MCM3         | 56               | 49              | 49              | 878                     | 971       | 879       |
| MCM4         | 62               | 56              | 56              | 912                     | 933       | 911       |
| MCM5         | 67               | 60              | 61              | 728                     | 775       | 720       |
| MCM6         | 65               | 55              | 53              | 880                     | 1017      | 892       |
| MCM7         | 60               | 58              | 57              | 781                     | 845       | 760       |

683

684 *Sc* – *Saccharomyces cerevisiae*; *Sp* – *Schizosaccharomyces pombe*; *Ca* – *Candida albicans*

685 NA-Not applicable

686

687 **Table 8. Predicted molecular weight of the ORC proteins in *C. albicans*, *S. cerevisiae* and *S.***  
 688 ***pombe***

| ORC proteins | M.W in <i>S.cerevisiae</i><br>(in KDa) | M.W in <i>S.pombe</i><br>(in KDa) | M.W in <i>C.albicans</i><br>(in KDa) |
|--------------|----------------------------------------|-----------------------------------|--------------------------------------|
| ORC1         | 120                                    | 80                                | 91                                   |
| ORC2         | 72                                     | 61                                | 78.6                                 |
| ORC3         | 62                                     | 80                                | 79.2                                 |
| ORC4         | 56                                     | 108                               | 64                                   |
| ORC5         | 53                                     | 52                                | 57                                   |
| ORC6         | 50                                     | 31                                | 41                                   |
| <b>Total</b> | <b>~412</b>                            | <b>~412</b>                       | <b>~412</b>                          |

689

690

691 **Table 9. Cscore values of CaORC proteins**

692

| <b>ORC proteins</b> | <b>Cscore<sup>GO</sup></b> | <b>Cscore<sup>LB</sup></b> |
|---------------------|----------------------------|----------------------------|
| ORC1                | 0.24                       | 0.41                       |
| ORC2                | 0.25                       | 0.02                       |
| ORC3                | 0.16                       | 0.01                       |
| ORC4                | 0.29                       | 0.6                        |
| ORC5                | 0.29                       | 0.58                       |
| ORC6                | 0.21                       | 0.01                       |

693

694 **Table 10. SMART predictions of pre-RC proteins' interactions**

| <b>Pre-RC protein</b> | <b>Domains / motifs</b> | <b>Putative interacting partners</b>                                               |
|-----------------------|-------------------------|------------------------------------------------------------------------------------|
| CAORC1                | BAH & AAA               | ORC2,CDC6,CDC46, <u>CDC54,MCM2,MCM3,MCM6, CAWG05_985</u> ,POL12,LRO1               |
| CAORC2                |                         | ORC1,CDC6,CDC46, <u>CDC54</u> ,CDC45,CDC7, <u>MCM2, MCM3,MCM6,CAWG05_985</u>       |
| CAORC3                |                         | -                                                                                  |
| CAORC4                | AAA                     | <u>CDC54</u> ,CDC6, <u>MCM2,MCM3,MCM6,CAWG05_985</u>                               |
| CAORC5                |                         | -                                                                                  |
| CAORC6                |                         | -                                                                                  |
| CACDC6                | AAA                     | -                                                                                  |
| CAMCM2                | MCM                     | ORC1,ORC2,CDC45,CDC46, <u>CDC54</u> ,CDC7, <u>MCM3, MCM6,CAWG05_985</u> ,RFA1      |
| CAMCM3                | AAA / MCM               | ORC1,ORC2,ORC4,CDC45,CDC46, <u>CDC54</u> ,CDC7, <u>MCM2, MCM3,MCM6, CAWG05_985</u> |
| CAMCM4 / CDC54        | MCM                     | ORC1,ORC2,CDC45,CDC46, <u>CDC54</u> ,CDC7, <u>MCM2, MCM3,MCM6, CAWG05_985</u>      |
| CAMCM5 / CDC46        | AAA / MCM               | CDC45, <u>CDC54</u> ,CDC7, <u>MCM2,MCM3,MCM6, CAWG05_985</u> ,PRI1, POL30, RFA1    |

|        |              |                                                                                               |
|--------|--------------|-----------------------------------------------------------------------------------------------|
| CAMCM6 | MCM          | ORC1,ORC2,ORC4,CDC45,CDC46, <u>CDC54</u> ,CDC7, <u>MCM2</u> ,<br><u>MCM3,MCM6, CAWG05_985</u> |
| CAMCM7 | AAA /<br>MCM | -                                                                                             |

695 Note : CAWG05\_985 = MCM7

696

697





**A**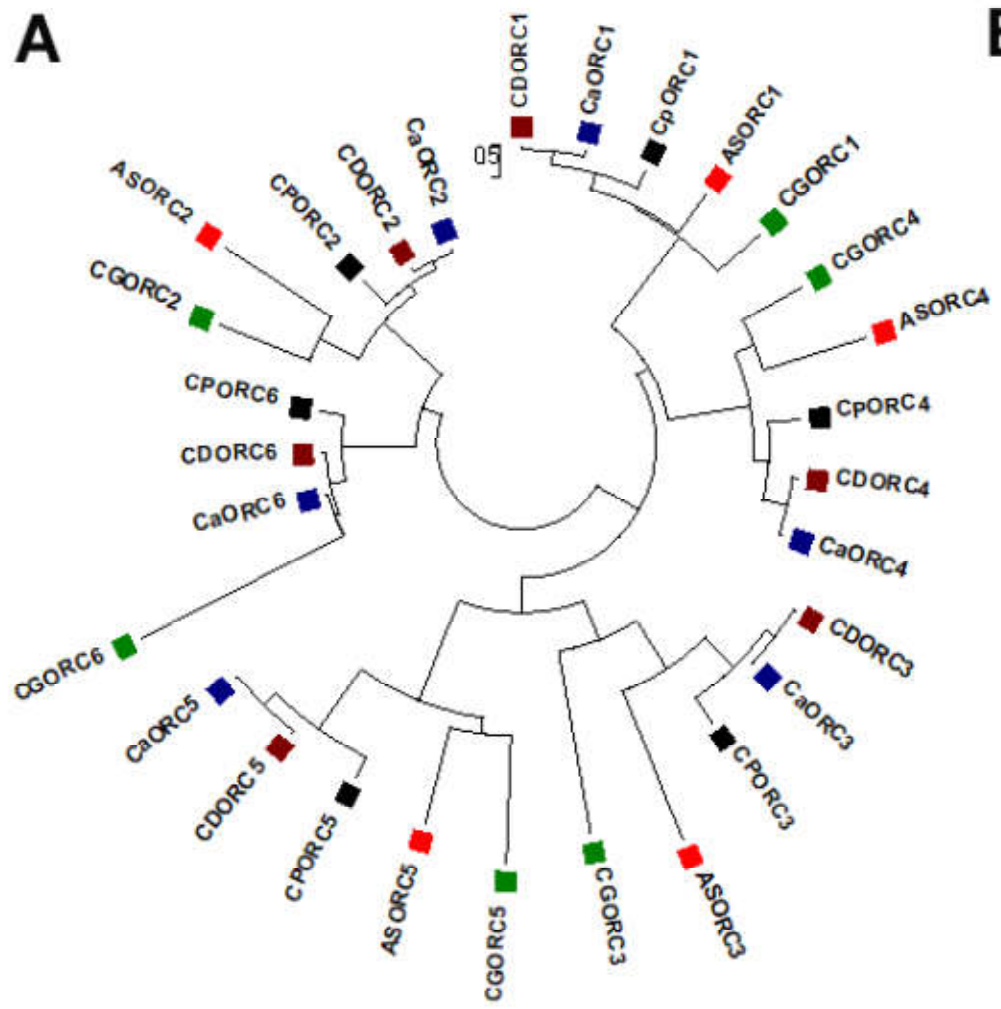**B**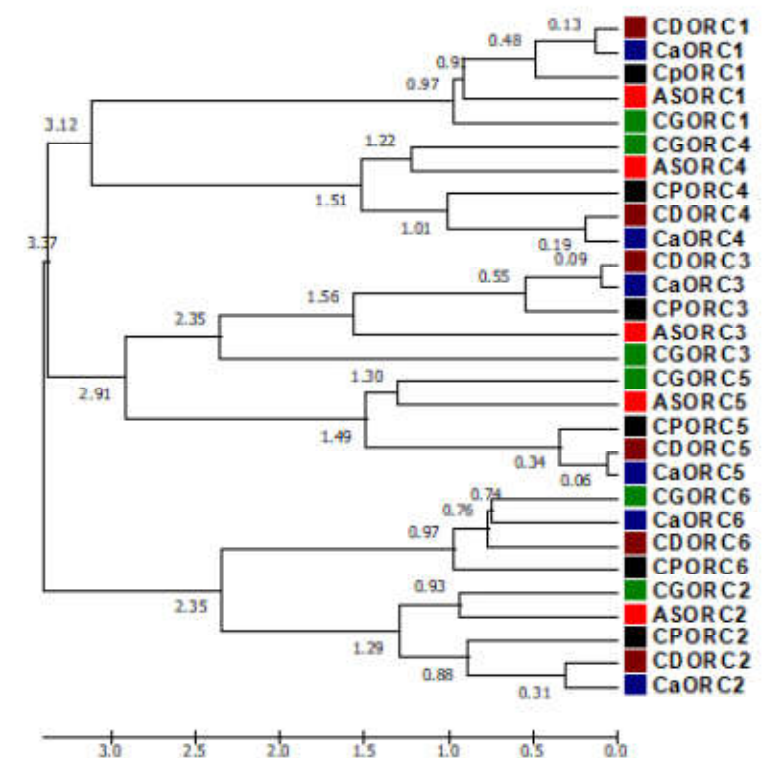

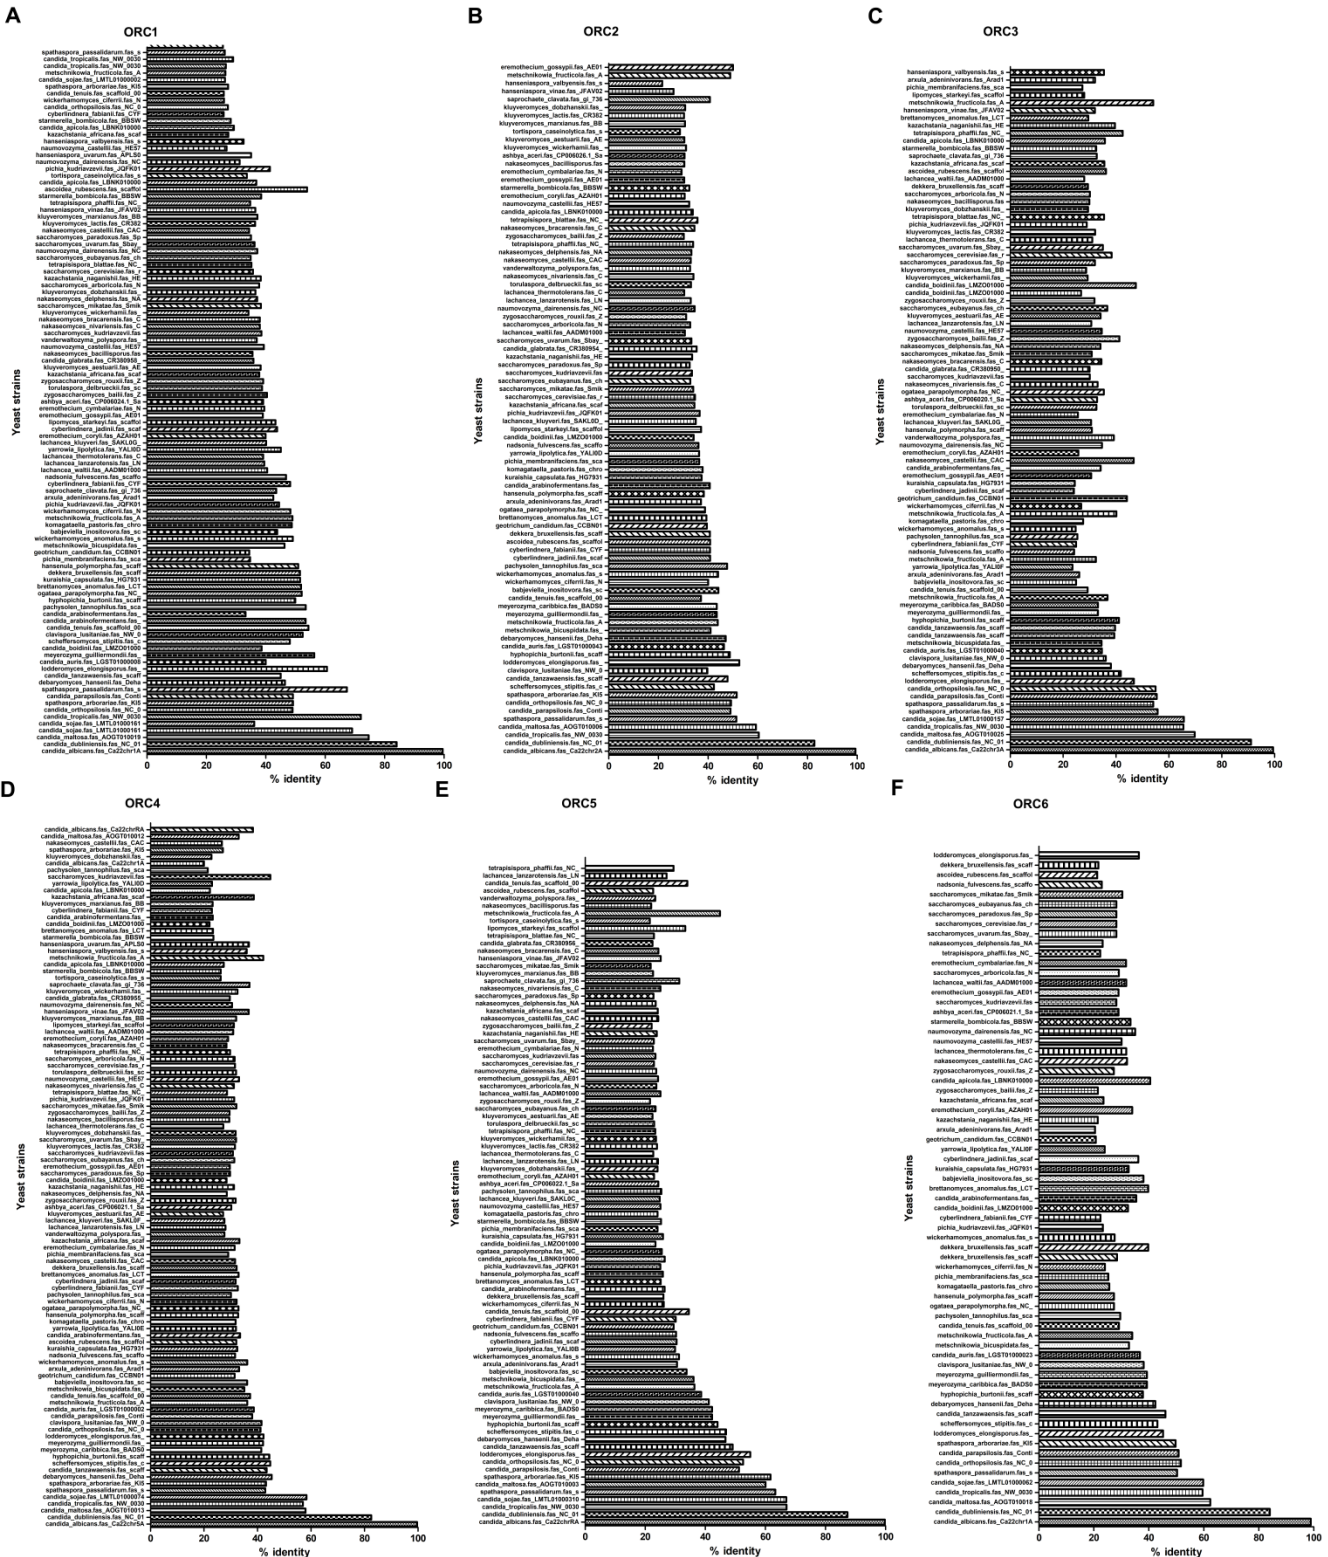

**A**

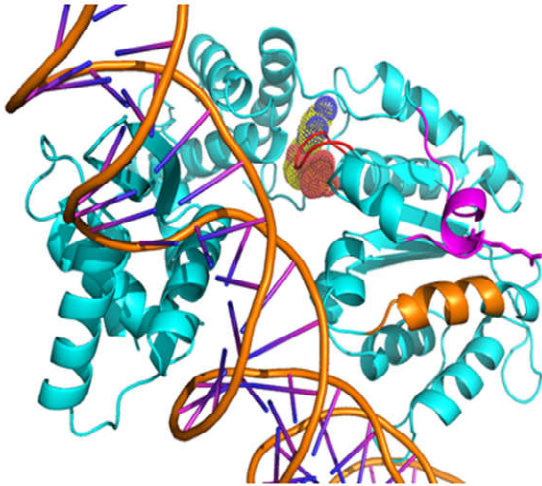

**B**

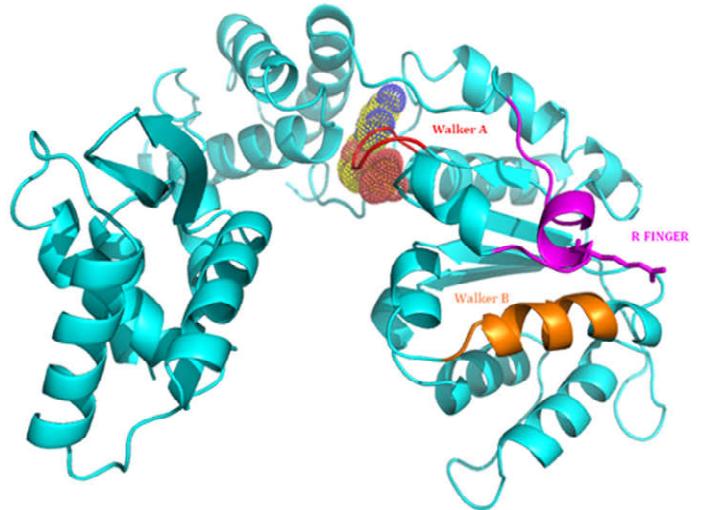

**C**

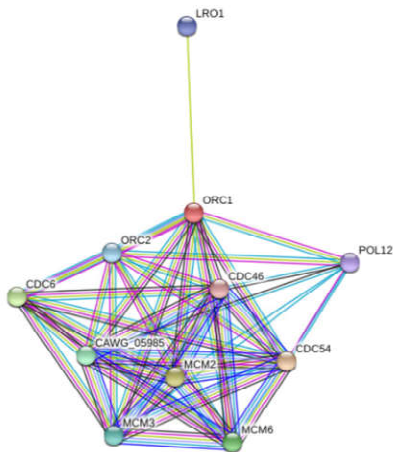

**D**

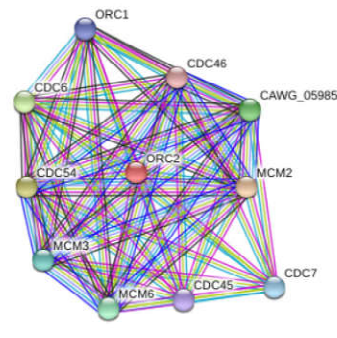

**E**

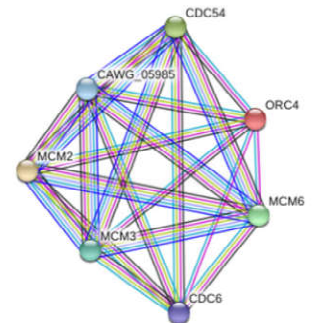

**F**

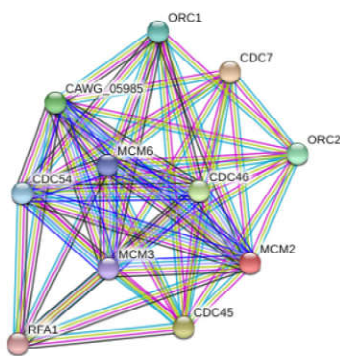

**G**

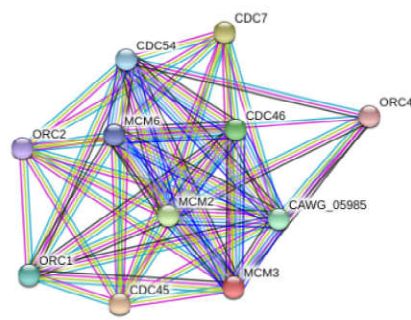

**H**

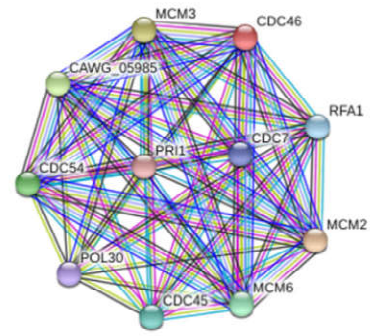

Source: https://www.biorxiv.org/content/10.1101/430892v1.full.pdf
